# Supplementary material for: Biorenewable rosin derived benzocyclobutene resin: a thermosetting material with good hydrophobicity and low dielectric constant
Source: Royal Society of Chemistry journal article supplement (doi:10.1039/c9ra04828f), 2019-01-01
Supplement: c9ra04828f1.pdf [file c9ra04828f1.pdf]

**Biorenewable rosin derived benzocyclobutene resin: a thermosetting  
material with good hydrophobicity and low dielectric constant**

Fei Fu,<sup>ab</sup> Dan Wang,<sup>ac</sup> Minggui Shen,<sup>\*ac</sup> Shibin Shang,<sup>ac</sup> Zhanqian Song<sup>a</sup> and Jie Song<sup>d</sup>

<sup>a</sup> Institute of Chemical Industry of Forest Products, Chinese Academy of Forestry, Key Laboratory of Biomass Energy and Material, National Engineering Laboratory for Biomass Chemical Utilization, Key and Open Laboratory of Forest Chemical Engineering, State Forestry Administration, Nanjing 210042, Jiangsu Province, China

<sup>b</sup> Co-Innovation Center of Efficient Processing and Utilization of Forest Resources, Nanjing Forestry University, Nanjing 210037, People's Republic of China

<sup>c</sup> Institute of New Technology of Forestry, Chinese Academy of Forestry, Beijing 100091, China

<sup>d</sup> Department of Chemistry and Biochemistry, University of Michigan-Flint, Flint, Michigan 48502, United States

This electronic supplementary information is composed of the total of 6 pages, including 10 figures.

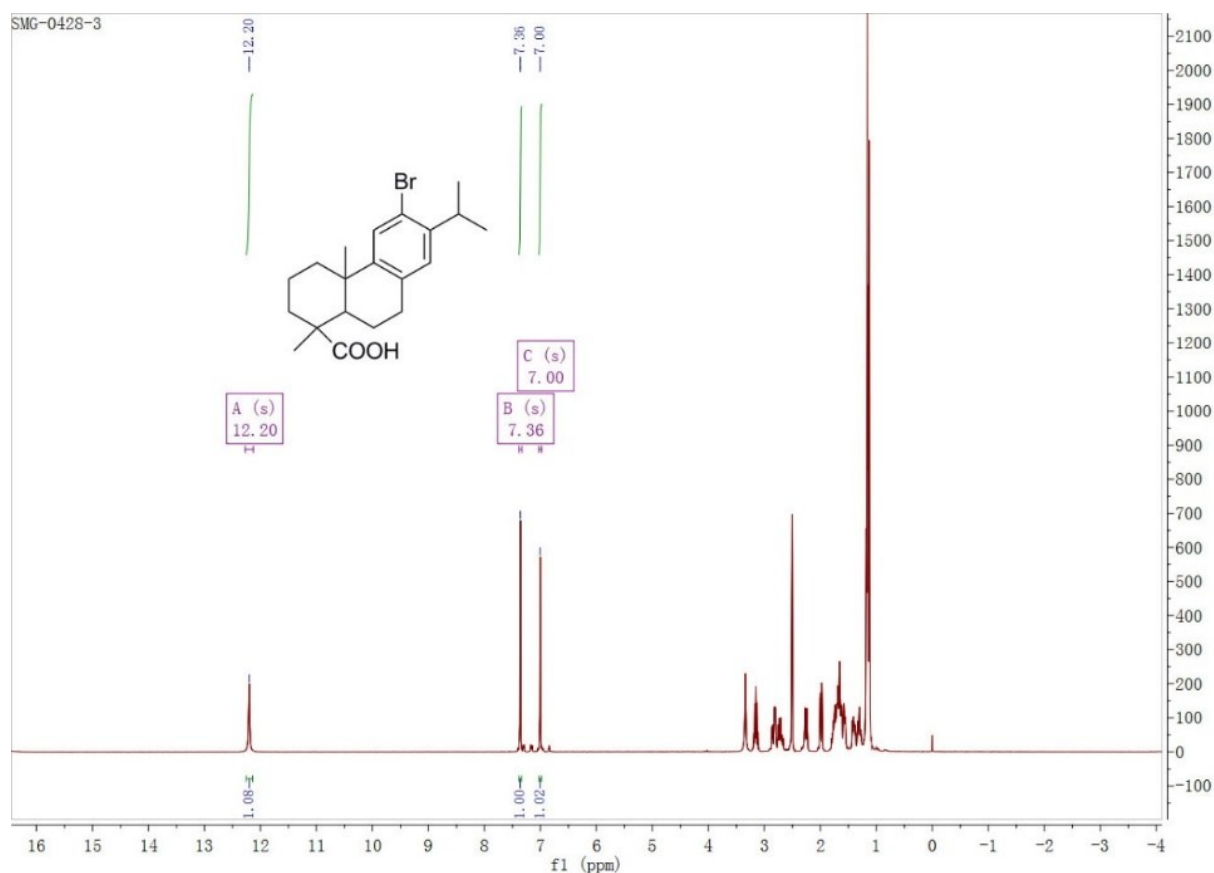

Fig. S1  $^1\text{H}$  NMR spectrum of Compound 1 (400 MHz, DMSO).

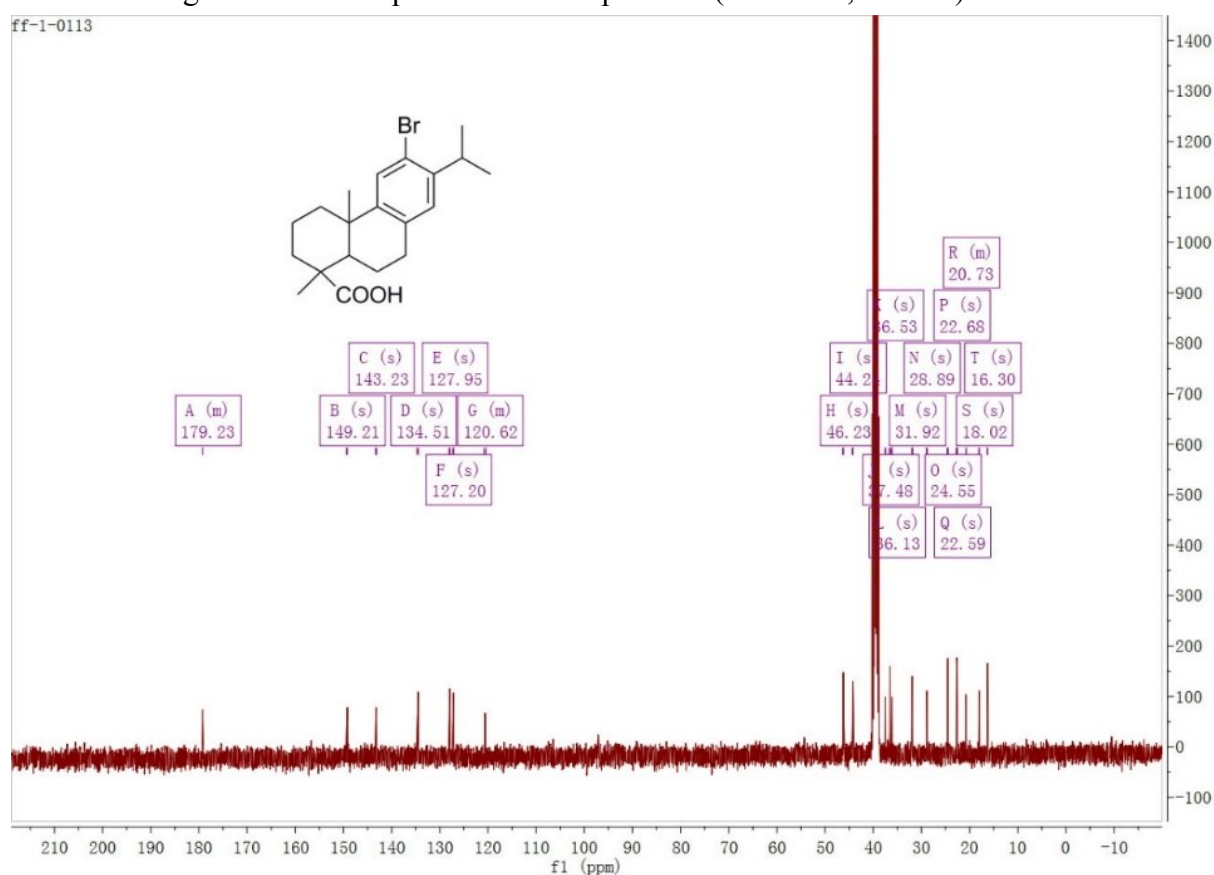

Fig. S2  $^{13}\text{C}$  NMR spectrum of Compound 1 (101 MHz, DMSO).

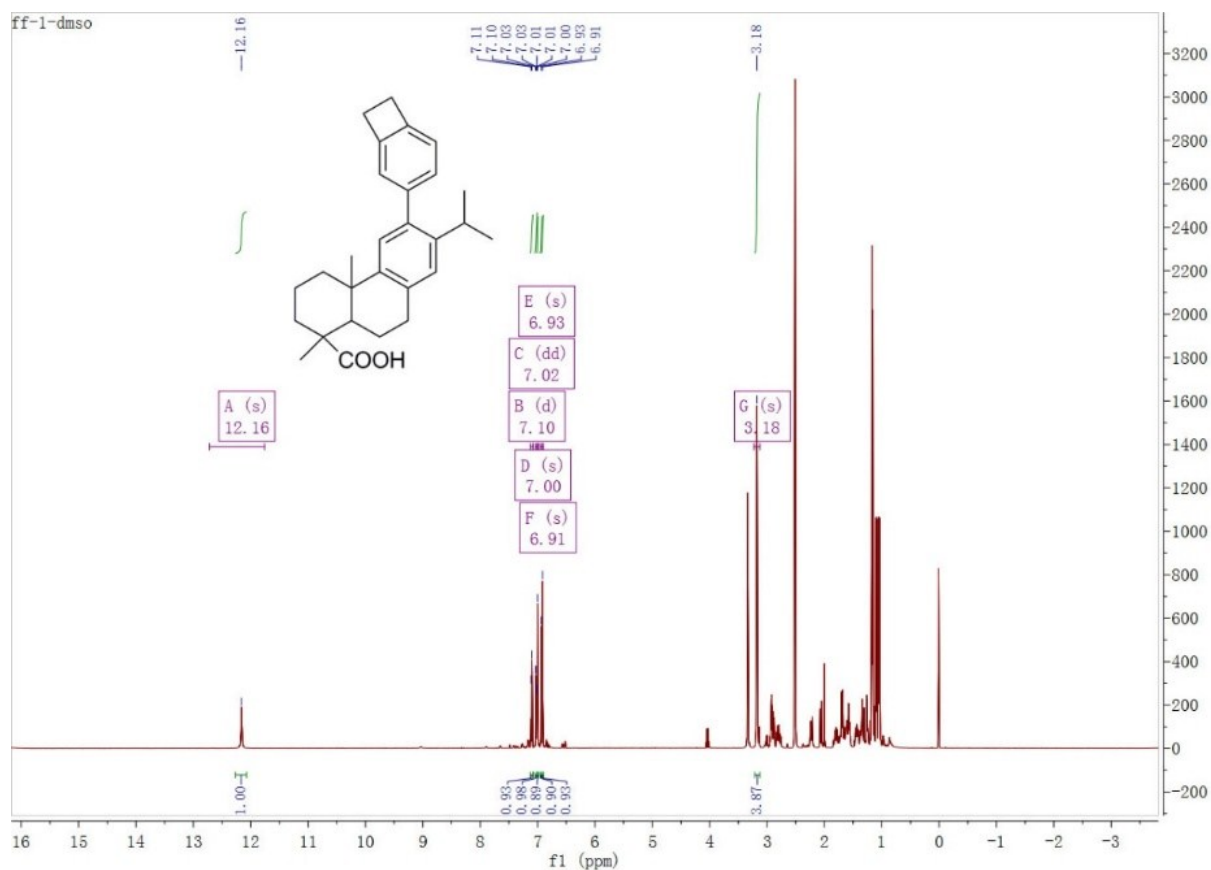

Fig. S3  $^1\text{H}$  NMR spectrum of Compound **2** (400 MHz, DMSO).

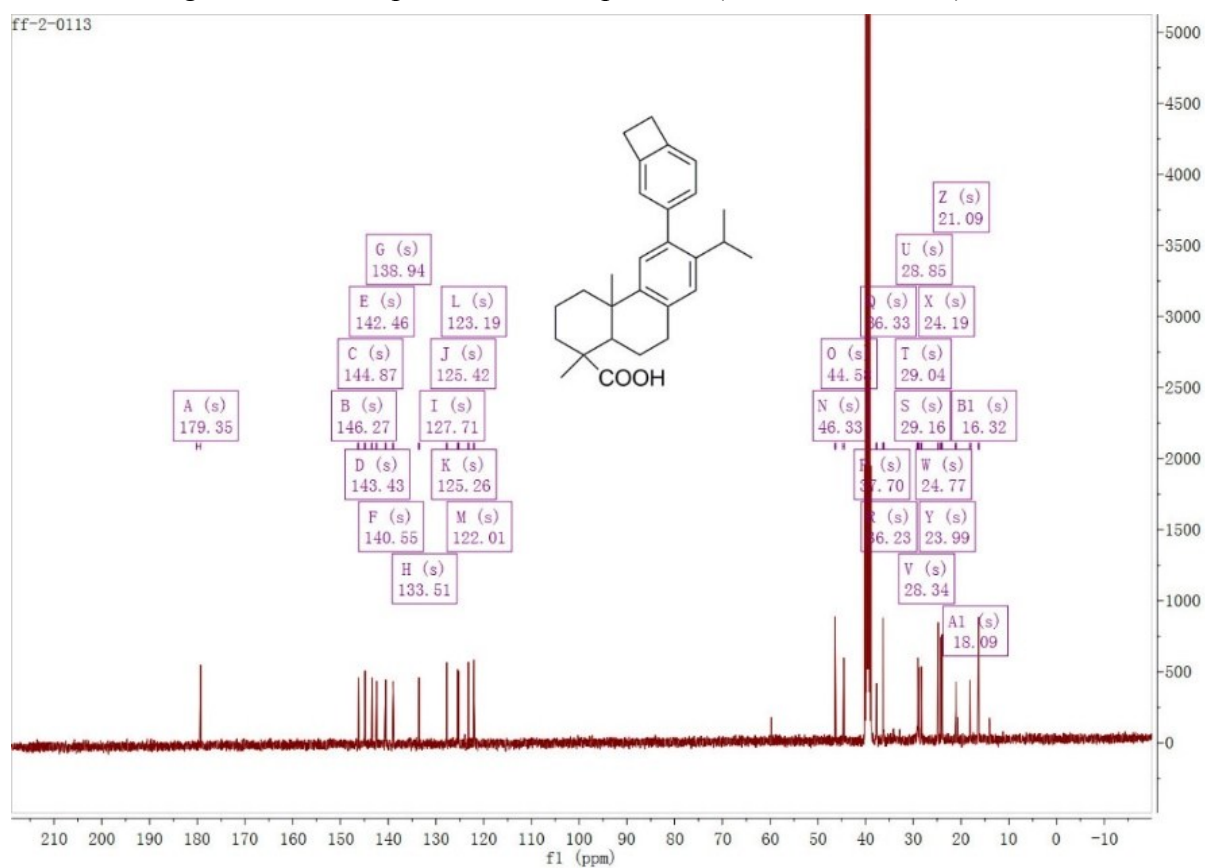

Fig. S4  $^{13}\text{C}$  NMR spectrum of Compound **2** (101 MHz, DMSO).

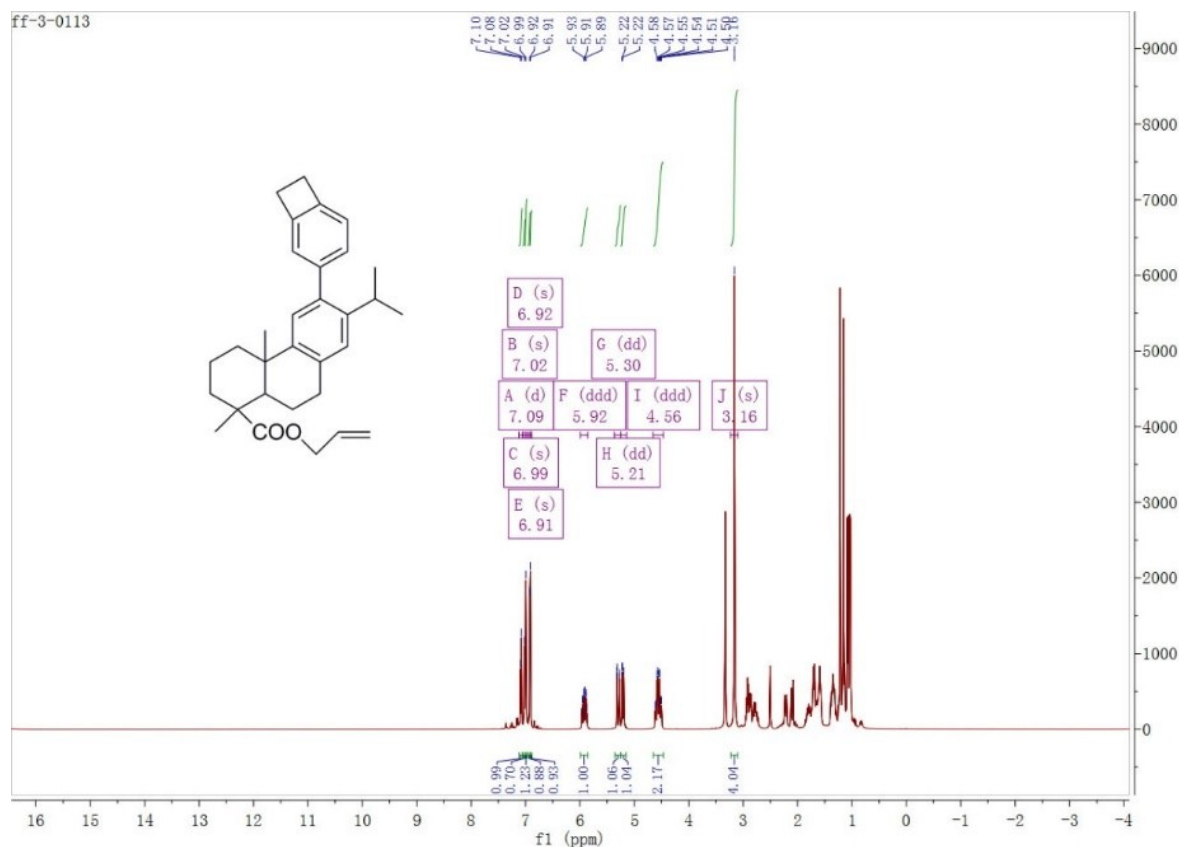

Fig. S5 <sup>1</sup>H NMR spectrum of Monomer **3** (400 MHz, DMSO).

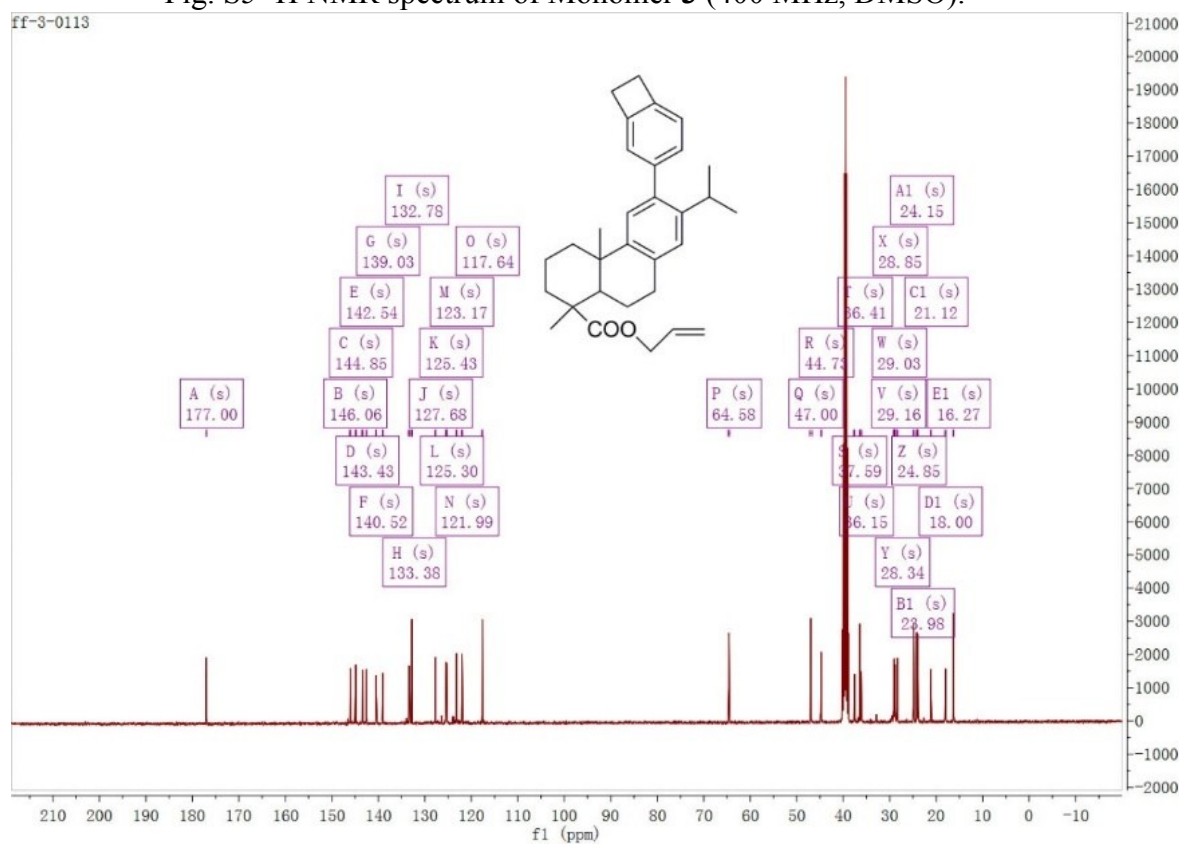

Fig. S6 <sup>13</sup>C NMR spectrum of Monomer **3** (101 MHz, DMSO).

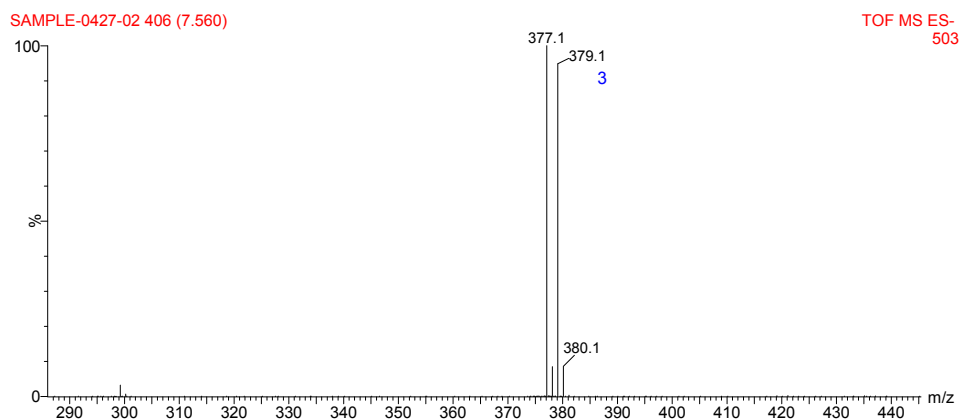

Fig. S7 MS spectrum of Compound 1.

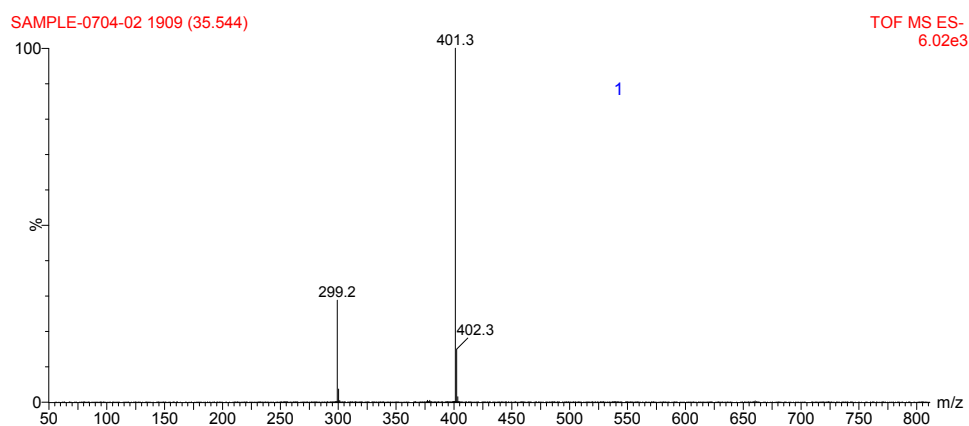

Fig. S8 MS spectrum of Compound 2.

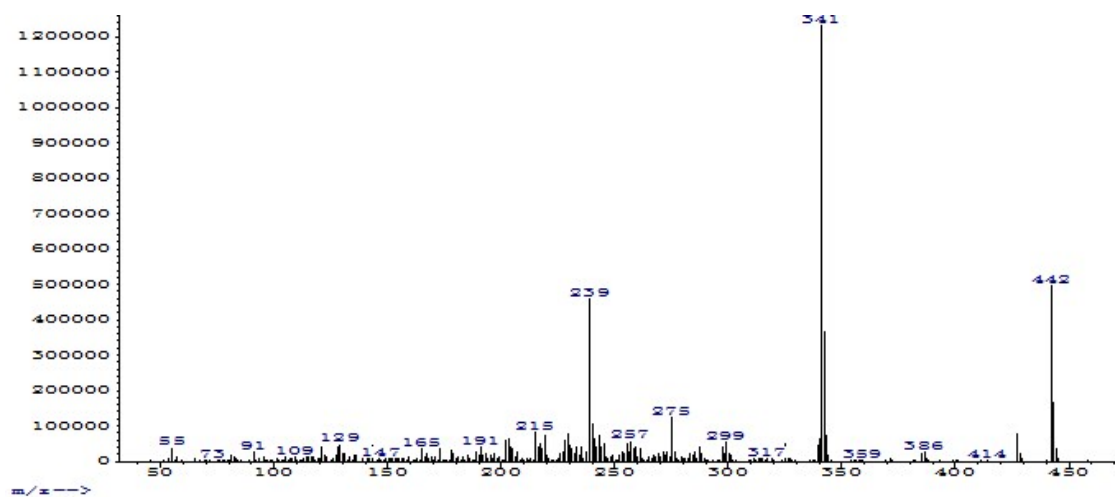

Fig. S9 MS spectrum of Monomer 3.

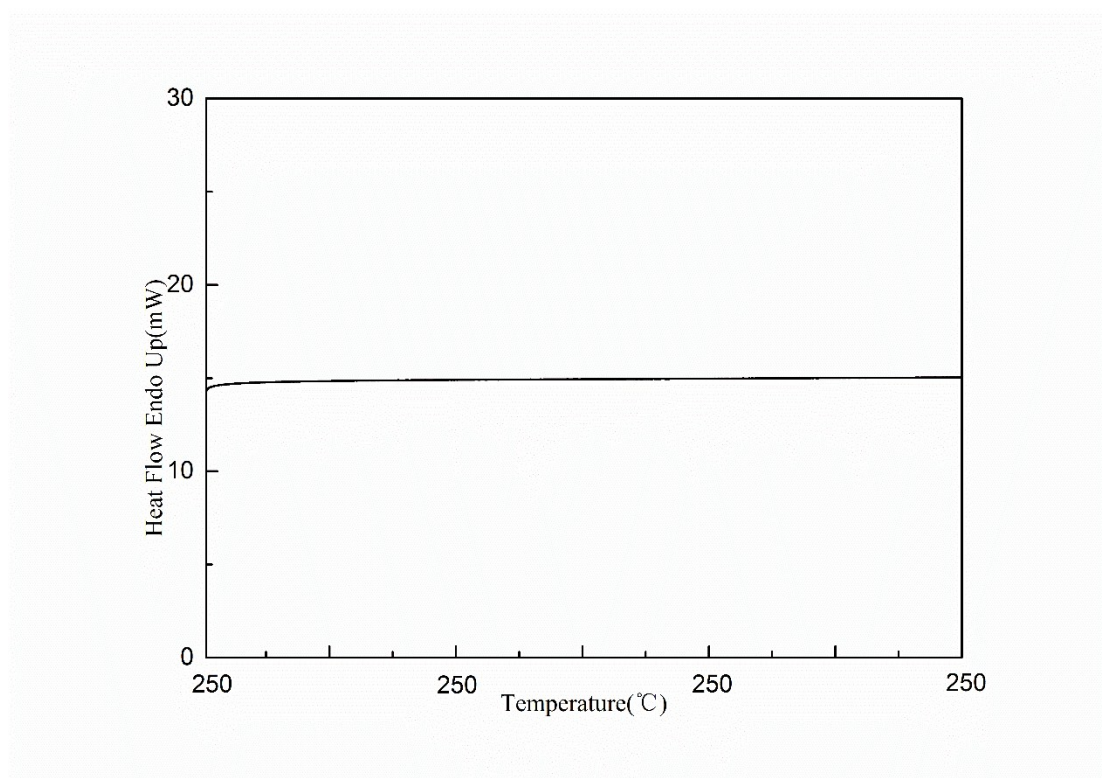

Fig. S10 DSC trace of polymerized the cured resin under N<sub>2</sub> at 250°C for 2 h.
